# Supplementary material
Source: Springer Nature journal article supplement (https://www.springermedizin.de/resource/supplementary/13054_2013_3009_MOESM1_ESM.pdf/9712386)
Supplement: MOESM1 [file 9712386]

n = 547,218

Out-of-hospital cardiac arrest in Japan between January 1, 2005, and December 31, 2009

n = 51,611

Excluded

9,677 Age < 18 years or unknown

838 Missing 1-month CPC data

13,891 Physician-manned ambulances or unknown

334 Call-to-response time unknown

3,610 AED use unknown

23,261 ECG data improper

n = 495,607

Eligible patients

Development group (2005-2008) n = 390,577

Validation group (2009) n = 105,030
